# Supplementary material
Source: PubMed Central journal article supplement (PMC1895536)
Supplement: blood_blood-2006-02-001354_4.pdf [file blood_blood-2006-02-001354_4.pdf]

| <u>Tumor</u> | <u>MMHCC</u> | <u>Mut freq<sup>1</sup> (<math>\times 10^{-4}</math>)</u> | <u>C to T<sup>2</sup></u> | <u>C to G</u> | <u>G to A</u> | <u>A to G</u> |
|--------------|--------------|-----------------------------------------------------------|---------------------------|---------------|---------------|---------------|
| K7           | BLL          | 11.5 (21/18,190)                                          | 47.6%                     | 9.5%          | 23.8%         | 19.0%         |
| K9           | DLBCL        | 14.5 (12/8,285)                                           | 33.3%                     | 16.7%         | 8.3%          | 41.7%         |
| WT           | spleen       | 12 (10/8,321)                                             | 60.0%                     | 0.0%          | 10.0%         | 30.0%         |

<sup>1</sup> In parentheses is the number of mutations per number of total base pairs sequenced.

<sup>2</sup> Percentage of mutations representing the indicated mutation.
