# Supplementary material
Source: PubMed Central journal article supplement (PMC1895536)

7.0 kb —  
4.5 kb —

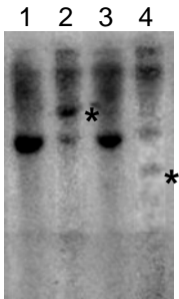

*Stul*

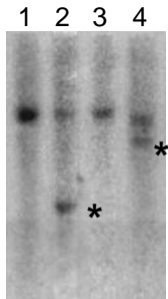

*EcoRI*

Supplement: blood_blood-2006-02-001354v2_3.pdf [file blood_blood-2006-02-001354v2_3.pdf]

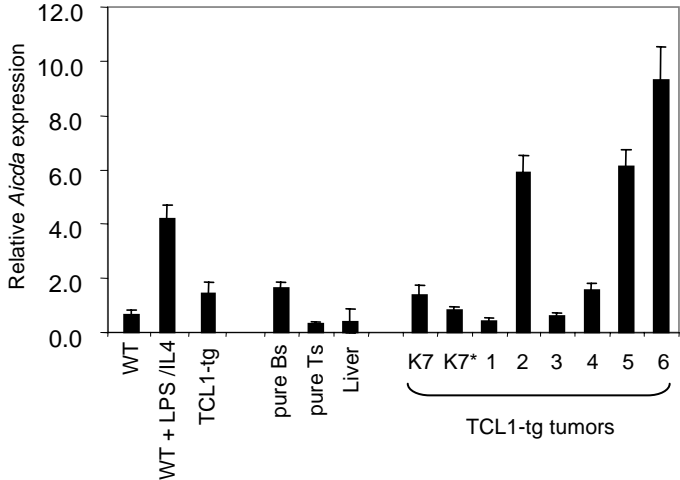

Supplement: blood_blood-2006-02-001354v2_6.pdf [file blood_blood-2006-02-001354v2_6.pdf]
